# Supplementary material for: Sesquiterpene Lactone Deoxyelephantopin Isolated from Elephantopus scaber and Its Derivative DETD-35 Suppress BRAFV600E Mutant Melanoma Lung Metastasis in Mice
Source: PubMed Central journal article supplement (PMC8004649; doi:10.3390/ijms22063226), 2021-03-22

## Supplementary Information

**Supplementary Figure S1.** Bar graphs for the western blot data from the main Figure 1B, Figure 2C, Figure 2E, Figure 3C, Figure 4C, and Figure 5E.

**(A) Bar graph corresponding to Figure 1B.** Western blotting was performed to check the expression of the basal levels of metastasis-related proteins in A375, A375LM<sup>IF4g/Luc</sup>, A375LM3<sup>IF4g/Luc</sup>, and A375LM5<sup>IF4g/Luc</sup> melanoma cells. Increased/decreased protein levels among different cells are presented as a fold change to the vehicle control after normalization to  $\beta$ -actin.

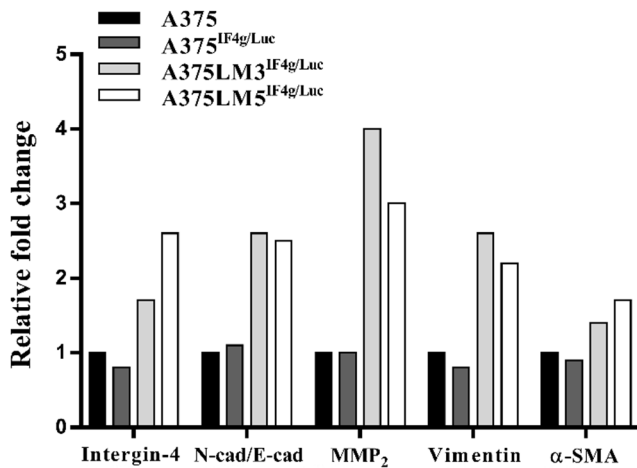

**(B) Bar graphs corresponding to Figure 2C.** The melanoma lung-seeking A375LM5<sup>IF4g/Luc</sup> cells were incubated with vehicle, DET, DETD-35 or PLX for 24 h and the expression of the cell cycle proteins were analyzed using western blotting. Increased/decreased protein levels among treatments are presented as a fold change to the vehicle control after normalization to  $\beta$ -actin.

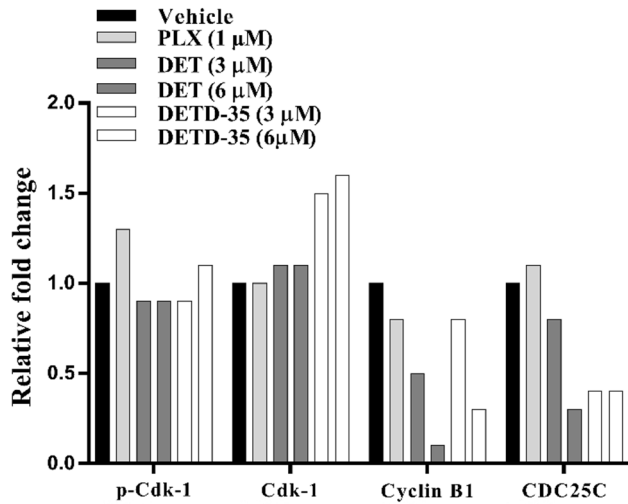

**(C) Bar graphs corresponding to Figure 2E.** The melanoma lung-seeking  $A375LM5^{IF4g/Luc}$  cells were incubated with vehicle, DET, DETD-35 or PLX for 48 h and the expression of the apoptotic proteins were analyzed by western blotting. Increased/decreased protein levels among treatments are presented as a fold change to the vehicle control after normalization to  $\beta$ -actin.

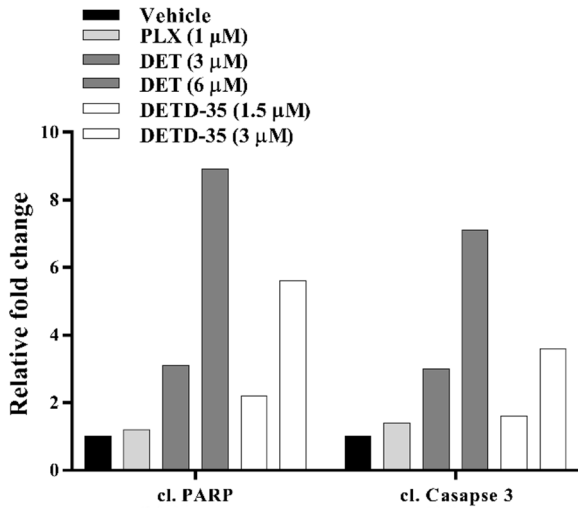

**(D) Bar graphs corresponding to Figure 3C.**  $A375LM5^{IF4g/Luc}$  cells were incubated with vehicle, DET, DETD-35 and PLX for 48 h. The expression levels of metastatic protein markers were analyzed by western blotting. Increased/decreased protein levels among treatments are presented as a fold change to the vehicle control after normalization to  $\beta$ -actin.

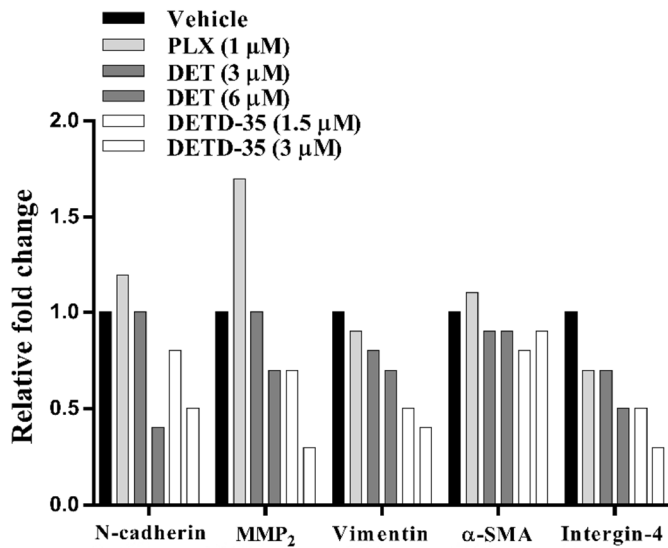

**(E) Bar graphs corresponding to Figure 4C.** The melanoma lung-seeking A375LM5<sup>IF4g/Luc</sup> cells were pre-treated with/without GSH (5 mM) for one hour and then incubated with vehicle, DET or DETD-35 for 48 h and expression levels of apoptotic protein markers were analyzed by western blotting. Increased/decreased protein levels among treatments are presented as a fold change to the vehicle control after normalization to β-actin.

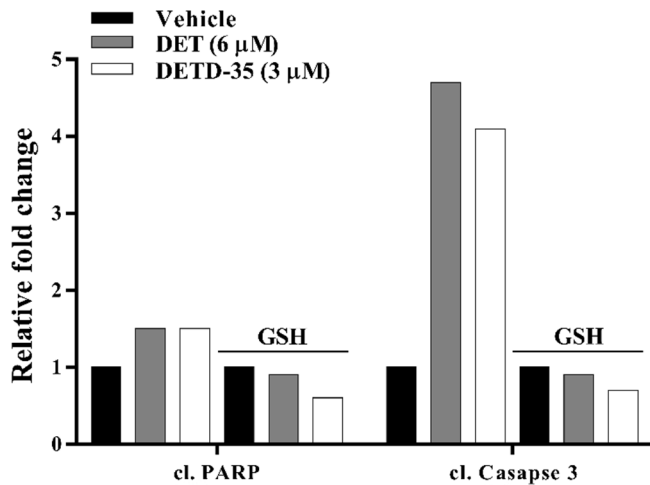

**(F) Bar graphs corresponding to Figure 5E.** (E) A375LM5<sup>IF4g/Luc</sup> cells were incubated with vehicle, DET or DETD-35 for 6 h and 12 h. The protein expression levels were analyzed by western blotting. Increased/decreased protein levels among treatments are presented as a fold change to the vehicle control after normalization to β-actin.

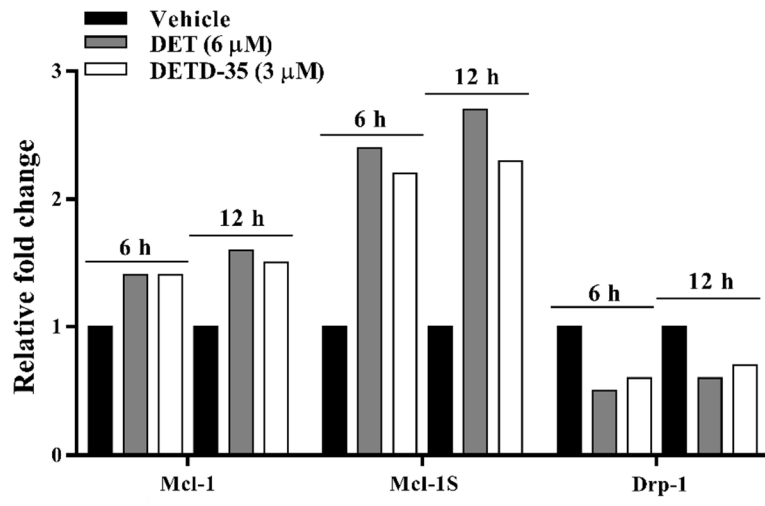

Supplement: ijms-22-03226-s001.pdf [file ijms-22-03226-s001.pdf]
